# Supplementary material for: The tetratricopeptide repeat-containing protein slow green1 is required for chloroplast development in Arabidopsis
Source: PubMed Central journal article supplement (PMC3935568; doi:10.1093/jxb/ert463), 2014-01-13
Supplement: supp_ert463_jexbot107888_file001.pdf [file supp_ert463_jexbot107888_file001.pdf]

The Tetratricopeptide Repeat-Containing Protein Slow Green1 Is Required for Chloroplast Development in *Arabidopsis*

Zhihong Hu, Fan Xu, Liping Guan, Pingping Qian, Yaqiong Liu, Huifang Zhang, Yan Huang, and Suiwen Hou

Supplementary Information

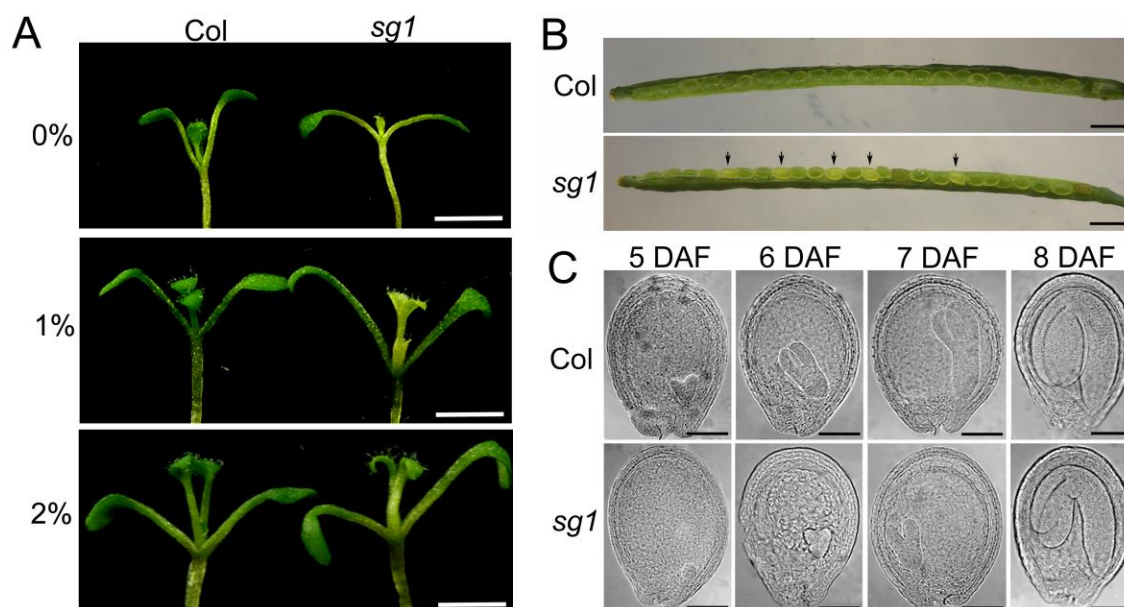

Figure S1. Early growth of *sg1* favored by sucrose, and delayed embryogenesis during *sg1* seed development. (A) 10 days old seedlings grew on Murashige–Skoog medium supplemented with 1% and 2% sucrose. (B) 10 DAF siliques from wild and *sg1*<sup>+/-</sup> heterozygous. (C) Embryo development in wild-type (upper panels) and *sg1* plants (lower panels). Arrowheads showed the seeds of delayed embryogenesis. Abbreviations: DAF, day after fertilization. Bars = 0.5 cm in (A); 0.5 mm in (B); and 100  $\mu$ m in (C).

A

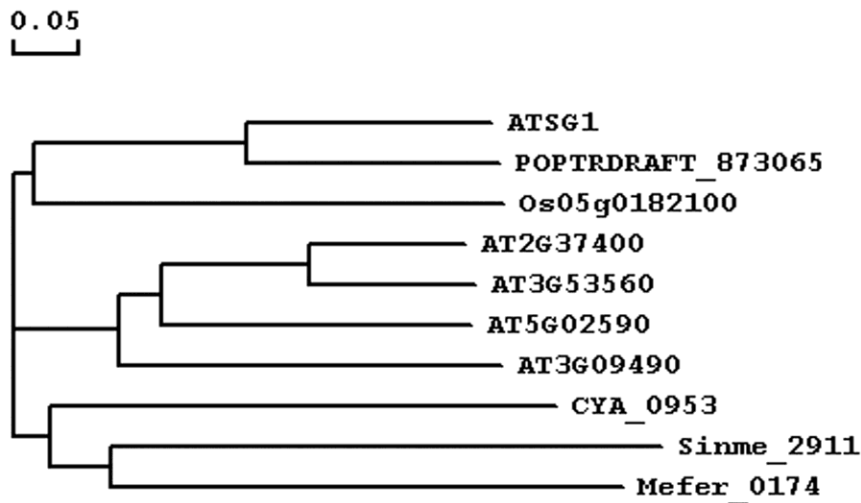

B

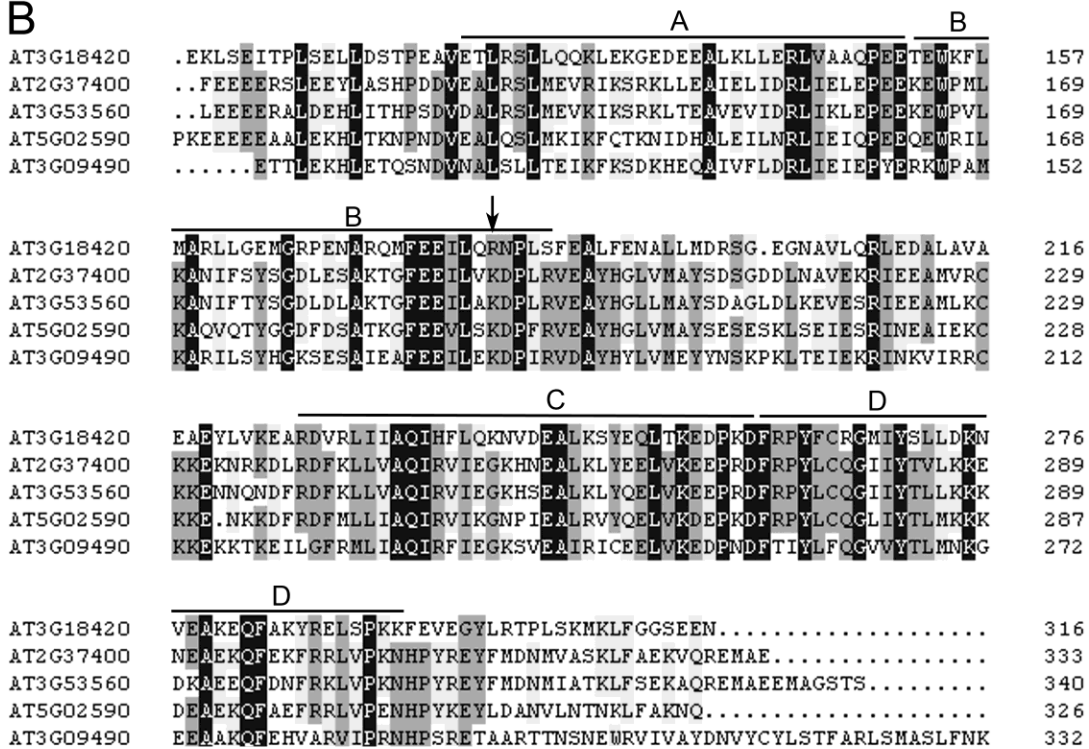

Figure S2. Phylogenetic analysis and amino acid sequence alignment of SG1 TPR domains. (A) Unrooted phylogenetic tree of SG1 and homologous proteins in *Arabidopsis thaliana*, *Populus trichocarpa*, *Oryza sativa*, *Synechococcus*, *Sinorhizobium* and *Methanocaldococcus*. (B) Comparison of the amino acid sequence of SG1 with *Arabidopsis thaliana* proteins AT3G09490, AT2G37400, AT3G53560, and AT5G02590. Black boxes indicate strictly conserved amino acids among these proteins. The arrow head indicates the mutation site of *sg1*; bars above the sequences labelled A to D indicate the four TPR domains of SG1.

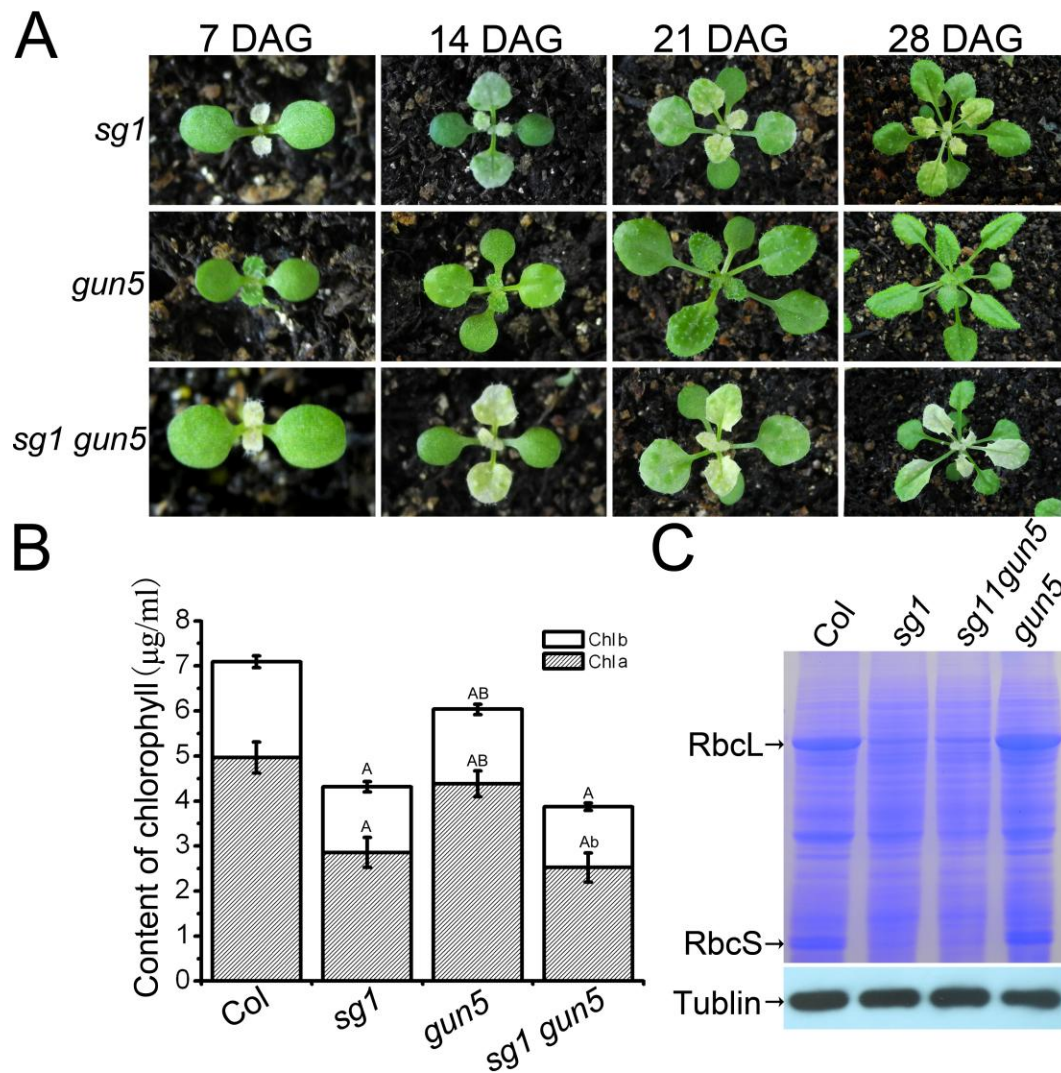

Figure S3. The phenotypes of *sg1 gun5* double mutant. (A) The seedlings of *sg1*, *gun5* and *sg1 gun5* grown for 1 to 4 weeks in soil. (B) Chlorophyll contents in 2-week-old Col, *sg1*, *gun5*, and *sg1 gun5* plants. (C) Total protein resolved by SDS-PAGE from Col, *sg1*, *sg1 gun5* and *gun5*, the arrows indicate the major bands of the large subunit (RbcL) and small subunit (RbcS) of RuBisCO. <sup>a</sup> Significantly different from Col,  $P < 0.05$ ; <sup>A</sup> Significantly different from Col,  $P < 0.01$ ; <sup>b</sup> Significantly different from *sg1*,  $P < 0.05$ ; <sup>B</sup> Significantly different from *sg1*,  $P < 0.01$ .

## Tables

Supplementary Table S1. Chlorophyll contents of leaves from different genotypes at different growth stages. Total chlorophylls were obtained from the sixth basal rosette leaves of 3-week-old, 4-week-old, and 5-week-old plants. Values represent mean  $\pm$  SD of three independent experiments.

<sup>a</sup> Significantly different from Col,  $P < 0.05$ , <sup>A</sup> Significantly different from Col,  $P < 0.01$ , <sup>b</sup> Significantly different from *sgl*,  $P < 0.05$ , <sup>B</sup> Significantly different from *sgl*,  $P < 0.01$ .

|              |                 | 3 weeks                        | 4 weeks                        | 5 weeks                        |              |                 | 3 weeks                        | 4 weeks                        | 5 weeks                        |
|--------------|-----------------|--------------------------------|--------------------------------|--------------------------------|--------------|-----------------|--------------------------------|--------------------------------|--------------------------------|
| Chl <i>a</i> | Col             | 3.08 $\pm$ 0.135               | 3.19 $\pm$ 0.076               | 3.27 $\pm$ 0.085               | Chl <i>b</i> | Col             | 1.33 $\pm$ 0.046               | 1.34 $\pm$ 0.084               | 1.39 $\pm$ 0.075               |
|              | <i>sgl</i>      | 0.87 $\pm$ 0.037 <sup>A</sup>  | 1.70 $\pm$ 0.084 <sup>A</sup>  | 2.66 $\pm$ 0.066 <sup>A</sup>  |              | <i>sgl</i>      | 0.434 $\pm$ 0.049 <sup>A</sup> | 0.82 $\pm$ 0.059 <sup>A</sup>  | 1.18 $\pm$ 0.085 <sup>A</sup>  |
|              | <i>gun1</i>     | 2.97 $\pm$ 0.015 <sup>aB</sup> | 3.06 $\pm$ 0.047 <sup>B</sup>  | 3.17 $\pm$ 0.043 <sup>B</sup>  |              | <i>gun1</i>     | 1.20 $\pm$ 0.032 <sup>aB</sup> | 1.23 $\pm$ 0.043 <sup>B</sup>  | 1.32 $\pm$ 0.054 <sup>B</sup>  |
|              | <i>sgl gun1</i> | 2.24 $\pm$ 0.053 <sup>AB</sup> | 2.90 $\pm$ 0.042 <sup>aB</sup> | 3.10 $\pm$ 0.015 <sup>aB</sup> |              | <i>sgl gun1</i> | 1.09 $\pm$ 0.016 <sup>AB</sup> | 1.25 $\pm$ 0.024 <sup>aB</sup> | 1.41 $\pm$ 0.038 <sup>aB</sup> |
|              | <i>gun4</i>     | 1.52 $\pm$ 0.126 <sup>AB</sup> | 1.76 $\pm$ 0.11 <sup>AB</sup>  | 2.22 $\pm$ 0.078 <sup>AB</sup> |              | <i>gun4</i>     | 0.55 $\pm$ 0.07 <sup>AB</sup>  | 0.67 $\pm$ 0.067 <sup>AB</sup> | 0.81 $\pm$ 0.081 <sup>AB</sup> |
|              | <i>sgl gun4</i> | 1.77 $\pm$ 0.083 <sup>AB</sup> | 2.15 $\pm$ 0.091 <sup>AB</sup> | 2.59 $\pm$ 0.112 <sup>AB</sup> |              | <i>sgl gun4</i> | 0.96 $\pm$ 0.072 <sup>AB</sup> | 1.07 $\pm$ 0.044 <sup>AB</sup> | 1.14 $\pm$ 0.065 <sup>AB</sup> |

Supplementary Table S2. The number of different phenotypic seedlings segregated in the F1 offspring of a reciprocal cross between Col and *sgl*. Seedlings of 10-day-old were examined to gather statistics.  $\chi^2$  was calculated based on an expected ratio of 3:1.

| Cross                                               | Number of seedlings |        | Approximate ratio of wild/mutant | $\chi^2$           |
|-----------------------------------------------------|---------------------|--------|----------------------------------|--------------------|
|                                                     | Wild-type           | Mutant |                                  |                    |
| <i>sgl</i> ( $\sigma$ ) $\times$ Col ( $\text{♀}$ ) | 249                 | 79     | 3:1                              | 0.14 ( $P > 0.5$ ) |
| Col ( $\sigma$ ) $\times$ <i>sgl</i> ( $\text{♀}$ ) | 171                 | 58     | 3:1                              | 0.01 ( $P > 0.5$ ) |

Supplementary Table S3. Primers of markers for first mapping.

| Chromosome | Markers | Forward (5'→3')              | Reverse (5'→3')                |                       |
|------------|---------|------------------------------|--------------------------------|-----------------------|
| 1          | EAT     | GCCACTGCGTGAATGATATG         | CGAACAGCCAACATTAATTCCC         |                       |
|            | JV18I19 | AATTCAGTATCGAGATACCC<br>CTCT | TGTCGTATATCAATCGAAAAAG<br>AGAT |                       |
|            | NGA392  | TTGAATAATTTGTAGCCATG         | GGTGTAAATGCGGTGTTC             |                       |
|            | NGA280  | CTGATCTCACGGACAATAGT<br>GC   | GGCTCCATAAAAAGTGCACC           |                       |
|            | NGA114  | CCTTCACATCCAAAACCCAC         | GCACATACCCACAACCAGAA           |                       |
| 2          | 5       |                              |                                |                       |
|            | 6       | CGCTACGCTTTTCGGTAAAG         | GCACAGTCCAAGTCACAACC           |                       |
| 3          | NGA168  | TCGTCTACTGCACTGCCG           | GAGGACATGTATAGGAGCCTCG         |                       |
|            | AthBIO2 | TGACCTCCTCTTCCATGGAG         | TTAACAGAAACCCAAAGCTTTC         |                       |
|            | b       |                              |                                |                       |
| 4          | NGA172  | AGCTGCTTCCTTATAGCGTC<br>C    | CATCCGAATGCCATTGTTC            |                       |
|            | NGA162  | CATGCAATTTGCATCTGAGG         | CTCTGTCACTCTTTTCCTCTGG         |                       |
|            | GAPAb   | CACCATGGCTTCGGTACTT          | TCCTGAGAATTCAGTGAACCC          |                       |
|            | NGA6    | TGGATTTCTTCTCTCTTCA          | ATGGAGAAGCTTACACTGATC          |                       |
| 5          | NGA8    | GAGGGCAAATCTTTATTTCTG<br>G   | TGGCTTTCGTTTATAAACATCC         |                       |
|            | NGA113  | TAGCCGGATGAGTTGGTACC         | TTTTTCCTTGTGTTGCATTCC          |                       |
|            | 9       |                              |                                |                       |
|            | 7       | NGA110                       | GCGAAAAAACAAAAAATC<br>CA       | CGACGAATCGACAGAATTAGG |
|            | NGA225  | GAAATCCAAATCCCAGAGAG<br>GG   | TCTCCCCACTAGTTTTGTGTCC         |                       |
| 5          | NGA106  | GTTATGGAGTTTCTAGGGCA<br>CG   | TGCCCCATTTTGTCTTCTC            |                       |
|            | NGA76   | GGAGAAAATGTCACTCTCCA<br>CC   | AGGCATGGGAGACATTTACG           |                       |
|            | NGA129  | TCAGGAGGA ACTAAAGTGA<br>GGG  | CACACTGAAGATGGTCTTGAGG         |                       |

Supplementary Table S4. Primers of markers for fine mapping

| Chromosome | Markers | Forward (5'→3')          | Reverse (5'→3')           |
|------------|---------|--------------------------|---------------------------|
|            | T11118  | GAAGGATATTTCCCAATTC<br>G | GACCCCTACCCGCTCCTTGA<br>C |
|            | MSJ11   | TAAGTGCATATATCCAGTAC     | CATTCTTCAGTTCTTGTATG      |
| 3          | MDC8    | TCCAATCATGAATCGTATTG     | ACTATGACTATCCATCCATG      |
|            | MKP6    | ATCTTGTAATCTGGTGCGTG     | GCAATAGCCCATGTGAATTC      |
|            | MYF24.3 | GAAATGTCGTCATCTTGTTTC    | TGTATAACTTCCTCCACAAG      |
|            | MYF24   | ACGATAATGTATGTGTGTAC     | TCAGTCTTCCTTACAATATG      |
|            | MIE15   | TCTCTGTAATTTCTCCAGC      | GTTGAGAAGCATACTAGAG<br>A  |

Supplementary Table S5. Primers of qRT-PCR

| Name             | Forward (5'→3')          | Reverse (5'→3')         |
|------------------|--------------------------|-------------------------|
| $\beta$ -tubulin | GATTTCAAAGATTAGGGAAGAGTA | GTTCTGAAGCAAATGTCATAGAG |
| <i>SG1</i>       | GCTGAGGCTGAGTATTTGGTGA   | GCTCTTCAATGCTTCATCCAC   |
| <i>psaB</i>      | GGACCCCACTACTCGTCGTA     | ATTGCTAATTGCCCGAAATG    |
| <i>psbA</i>      | GAGCAGCAATGAATGCGATA     | CCTATGGGGTCGCTTCTGTA    |
| <i>psbB</i>      | CGTGCGACTTTGAAATCTGA     | TAGCACCATGCCAAATGTGT    |
| <i>RbcL</i>      | GTGTTGGGTTCAAAGCTGGT     | CATCGGTCCACACAGTTGTC    |
| <i>accD</i>      | TGTGGATTCAATGCGACAAT     | TTTTGCGCAGAGTCAATACG    |
| <i>ycf2.2</i>    | GGGTTCAACAAGCAATCGAT     | CCGATGTATCATTTCTGGGT    |
| <i>rpoA</i>      | CAAGCCGACACAATAGGCAT     | AGCGCGTTGCGCGTTCCAT     |
| <i>PsbO</i>      | CTCGAAACTTCCTCGGCTC      | AATCCGGCGATTTTGACAG     |
| <i>PORB</i>      | GCAATGCTGCGGTTTATTTTC    | GAGAAGAAAATGTCCCAAATGG  |
| <i>rpoB</i>      | GCGAAAGAATCCTCCTATGC     | CCACCTCACATCAATAACTC    |
| <i>CAB2</i>      | TCGCAAGGAACCGTGAGCTA     | AGCCTTGAACCAAACCTGCCT   |
| <i>RbcS</i>      | CCTAGACCCTCCGATCACTC     | GGTTTGGTCTAGTGCTTTGG    |

## METHODS USED IN SUPPLEMENTARY MATERIALS

### *Observation of embryo development*

To examine the development of the embryos, ovules from the self-fertilising heterozygous siliques at different developmental stages were treated with a clearing solution of chloral hydrate, water, and glycerol (8:3:1, w/v/v) for 12 h. The developing embryos were then analysed under an optical microscope (Motic).
